# Supplementary material for: De Novo Analysis of Wolfiporia cocos Transcriptome to Reveal the Differentially Expressed Carbohydrate-Active Enzymes (CAZymes) Genes During the Early Stage of Sclerotial Growth
Source: Front Microbiol. 2016 Feb 3;7:83. doi: 10.3389/fmicb.2016.00083 (PMC4738778; doi:10.3389/fmicb.2016.00083)
Supplement: TABLE S2 — Differentially expressed carbohydrate-active enzymes (CAZymes) genes between W. cocos mycelium and 2-months-old sclerotium. The up-regulated genes were labeled with yellow fluorescence label. [file Table_2.XLSX]

## Sheet: Sheet1
		Expression changes
Gene ID	CAZY family	Mycelium	Two-months-old sclerotium
estExt_Genemark1.C_2_t20450	PL14	2.86453	7.90411
estExt_Genewise1Plus.C_7_t20422	PL14	0.319086	1.20688
estExt_fgenesh1_kg.C_190040	GT90	65.8915	19.3873
g2307_c10577_g1_i1	GT90	52.3333	3.33333
fgenesh1_pm.1_677	GT8	36.7623	66.0511
e_gw1.12.527.1	GT8	36.9216	22.7509
e_gw1.4.2203.1	GT8	10.392	9.32034
estExt_fgenesh1_kg.C_120055	GT8	74.7715	76.2639
estExt_fgenesh1_pm.C_120029	GT8	4.71207	8.05395
estExt_fgenesh1_pm.C_120141	GT8	101.998	92.7022
estExt_Genewise1Plus.C_1_t30199	GT8	26.1668	9.93027
estExt_Genewise1Plus.C_2_t60087	GT8	8.47558	8.95697
g18774_c19161_g1_i1	GT8	0.666667	1.33333
g314_c3025_g1_i1	GT8	34.99	9.20667
g5103_c13810_g1_i1	GT8	31.44	5.7
g7830_c15739_g1_i1	GT8	40.52	62.4367
estExt_Genewise1Plus.C_7_t10283	GT76	11.9949	14.455
estExt_fgenesh1_pm.C_100088	GT69	237.069	110.203
e_gw1.14.564.1	GT69	56.7423	58.7333
estExt_fgenesh1_kg.C_190043	GT69	26.0408	15.6868
g11037_c17173_g2_i1	GT69	10.81	3.18667
g8058_c15837_g1_i1	GT69	31.3333	6
fgenesh1_kg.8_472_#_isotig06050	GT66	34.5591	11.6546
estExt_fgenesh1_pm.C_1_t10203	GT59	35.305	24.7325
estExt_fgenesh1_kg.C_2_t10355	GT58	23.2035	16.9638
e_gw1.3.370.1	GT57	26.0406	28.5289
estExt_fgenesh1_kg.C_4_t10418	GT57	107.947	60.7049
g8427_c16004_g1_i1	GT57	1.57	2.87
e_gw1.2.50.1	GT50	37.0993	38.5841
fgenesh1_kg.2_310_#_isotig03417	GT5	21.5838	28.8864
g16748_c18797_g1_i2	GT5	2.25	2.15
estExt_fgenesh1_kg.C_150061	GT49	0.674119	0.751515
e_gw1.19.384.1	GT48	86.2607	108.67
e_gw1.2.1416.1	GT48	31.0378	38.0336
g10230_c16844_g1_i1	GT48	201	98.6667
fgenesh1_kg.2_662_#_isotig04428	GT4	161.148	389.062
estExt_Genewise1.C_3_t40036	GT4	104.876	61.989
estExt_Genewise1.C_9_t10450	GT4	25.6799	29.9822
estExt_Genewise1Plus.C_2_t50188	GT4	23.1093	20.1851
g11706_c17428_g1_i1	GT4	0.3333	2.32333
g16740_c18793_g2_i1	GT4	55.6667	9
g17274_c18912_g2_i1	GT4	21.3533	10.49
e_gw1.4.2719.1	GT39	92.2244	57.6335
estExt_fgenesh1_kg.C_2_t10138	GT39	57.5412	57.2411
estExt_fgenesh1_pm.C_80133	GT39	37.1703	20.8691
g3581_c12344_g1_i1	GT39	217	38.3333
g5054_c13751_g1_i1	GT39	103	31.3333
e_gw1.6.1368.1	GT35	740.544	1068.09
g10962_c17157_g1_i1	GT35	142.803	67
estExt_Genewise1.C_1_t10173	GT33	19.4028	20.3633
estExt_Genewise1.C_4_t30010	GT32	54.425	99.1715
g10158_c16817_g1_i1	GT32	0.52	5.95333
fgenesh1_kg.10_146_#_isotig06228	GT3	237.069	110.203
g11694_c17422_g1_i1	GT3	28.6667	6
estExt_Genewise1.C_2_t30014	GT28	30.4809	18.9949
g12036_c17537_g1_i1	GT28	2.66667	1.66667
estExt_Genewise1Plus.C_1_t20025	GT25	2.27673	0.968507
estExt_Genewise1.C_11_t10107	GT24	20.0824	5.14055
g792_c6364_g1_i1	GT24	97.4333	10.6667
fgenesh1_kg.1_774_#_isotig06467	GT22	98.0688	48.8781
estExt_fgenesh1_kg.C_5_t10178	GT22	34.2054	34.8347
estExt_Genewise1Plus.C_2_t20142	GT22	4.43919	50.1537
g9374_c16512_g1_i2	GT22	2.44	0
e_gw1.1.731.1	GT21	17.6617	11.9619
fgenesh1_kg.11_35_#_isotig03651	GT20	123.164	48.1754
e_gw1.6.6.1	GT20	65.3487	75.1291
fgenesh1_kg.5_415_#_isotig06528	GT20	88.5525	85.6418
g13048_c17879_g1_i1	GT20	384	61.6667
g13166_c17917_g1_i1	GT20	27.5933	3.02667
g4458_c13243_g1_i1	GT20	136.333	44.3333
estExt_fgenesh1_kg.C_200050	GT2	142.444	133.135
estExt_fgenesh1_pm.C_130026	GT2	1.41024	5.70161
estExt_fgenesh1_pm.C_70295	GT2	2.34384	4.8194
estExt_Genemark1.C_1_t30440	GT2	38.2627	37.753
estExt_Genewise1Plus.C_4_t50100	GT2	3.24165	0.741923
fgenesh1_kg.14_229_#_isotig04469	GT2	53.4452	73.3996
fgenesh1_kg.19_29_#_isotig05309	GT2	46.9844	45.2999
fgenesh1_kg.4_18_#_isotig05305	GT2	130.626	164.689
g10357_c16888_g2_i1	GT2	23.6667	6
g19065_c21972_g1_i1	GT2	0.333333	0.333333
g6532_c14915_g1_i1	GT2	255	102.333
g6773_c15080_g1_i1	GT2	103.667	44.6667
estExt_Genemark1.C_2_t10459	GT17	11.9694	15.7827
g10539_c16983_g1_i1	GT15	25	100.71
e_gw1.10.202.1	GT15	51.5499	247.976
estExt_fgenesh1_kg.C_2_t10329	GT15	54.1627	58.1056
fgenesh1_kg.10_264_#_isotig02787	GT15	30.5535	50.6623
g14062_c18155_g1_i1	GT15	2.16667	3.73
estExt_fgenesh1_kg.C_1_t10297	GT1	9.25335	15.9644
g9217_c16434_g1_i3	GT1	2.01667	1.3333
g7302_c15417_g2_i1	GH88	4.33333	1.66667
g10593_c17006_g1_i1	GH78	21.3267	8.68333
estExt_fgenesh1_kg.C_1_t10299	GH72	65.6566	15.7851
fgenesh1_pm.14_138	GH72	413.431	545.177
g3567_c12322_g1_i1	GH72	11.0533	8.35
g6221_c14705_g1_i2	GH72	432.73	308.497
estExt_Genewise1.C_7_t10130	GH55	68.4789	36.8699
fgenesh1_kg.2_378_#_isotig03212	GH55	558.82	186.631
estExt_Genewise1.C_16_t10325	GH55	34.3448	44.8952
g12322_c17635_g1_i2	GH55	40.5433	4.52333
g6597_c14972_g1_i1	GH55	927.667	75
estExt_Genewise1Plus.C_4_t10417	GH53	16.9409	25.0718
g13440_c17995_g1_i3	GH53	1.25	2.11
e_gw1.9.1060.1	GH51	73.9261	110.614
estExt_Genewise1Plus.C_9_t20439	GH51	12.5315	7.63931
fgenesh1_pg.9_305	GH51	73.9261	110.614
g16811_c18808_g1_i4	GH51	4.80667	45.1033
g658_c5559_g1_i1	GH5	1720.33	3.66667
estExt_fgenesh1_pg.C_1_t20061	GH5	990.056	13.692
fgenesh1_kg.8_485_#_isotig06884	GH5	100.305	7.88293
estExt_fgenesh1_kg.C_100177	GH5	94.395	6.57876
gm1.813_g	GH5	134.87	22.6556
estExt_Genewise1.C_1_t50255	GH5	91.33	2.78852
fgenesh1_kg.7_390_#_isotig04929	GH5	337.718	92.4203
estExt_fgenesh1_kg.C_1_t20400	GH5	34.4163	38.2489
e_gw1.11.1065.1	GH5	0.182243	6.75674
e_gw1.5.1430.1	GH5	16.7444	21.832
estExt_fgenesh1_kg.C_120218	GH5	41.1901	82.6792
estExt_fgenesh1_kg.C_160107	GH5	40.9501	23.9114
estExt_fgenesh1_kg.C_2_t10378	GH5	28.0005	53.7185
estExt_fgenesh1_kg.C_2_t20170	GH5	57.831	40.9651
estExt_fgenesh1_kg.C_4_t20227	GH5	8.81353	8.77621
estExt_fgenesh1_pm.C_1_t10169	GH5	2.35121	5.19606
estExt_fgenesh1_pm.C_2_t10338	GH5	1.16971	1.11828
estExt_Genewise1Plus.C_10_t10489	GH5	12.2346	4.8757
g13502_c18014_g1_i3	GH5	2.43	3.12
g16026_c18642_g1_i4	GH5	6.31	10.02
g16449_c18744_g2_i9	GH5	146.723	71.31
g17108_c18871_g1_i2	GH5	13.37	4
g17460_c18946_g1_i1	GH5	5.64667	3.62
g244_c2399_g1_i1	GH5	225.667	24
g3494_c12233_g1_i1	GH5	0.333333	0.312
g8123_c15884_g1_i2	GH5	7.90667	5.47
g9247_c16460_g1_i1	GH5	3.14333	46.721
g9249_c16460_g1_i5	GH5	10.0033	3.55
g4749_c13471_g1_i1	GH47	6502.33	59.3333
fgenesh1_pm.11_172	GH47	2409.42	9.07336
estExt_Genewise1.C_4_t30199	GH47	11.866	9.54184
fgenesh1_kg.1_1032_#_isotig03696	GH47	43.0078	44.3471
g1612_c9051_g1_i1	GH47	29.3333	5
g17989_c19044_g1_i3	GH47	3.59	1.33333
estExt_fgenesh1_kg.C_4_t10340	GH43	4.85117	3.50235
fgenesh1_kg.6_33_#_isotig05532	GH38	51.8414	36.2445
g9779_c16678_g3_i1	GH38	4.34	7.40667
fgenesh1_kg.3_516_#_isotig06177	GH37	114.53	63.4762
g4864_c13576_g1_i1	GH37	335.333	54.3333
e_gw1.3.2155.1	GH35	11.7184	14.2075
fgenesh1_kg.3_615_#_isotig05654	GH35	7.80626	8.24748
g10381_c16902_g1_i1	GH35	34.26	6.35
gm1.2239_g	GH31	150.964	33.235
fgenesh1_kg.3_248_#_isotig01507	GH31	20.8273	37.095
e_gw1.2.2852.1	GH31	15.7151	20.101
estExt_Genewise1Plus.C_3_t20262	GH31	5.30699	14.1351
fgenesh1_kg.12_188_#_isotig05752	GH31	79.6408	30.9554
g11505_c17355_g2_i1	GH31	33	3.66667
g11506_c17355_g3_i1	GH31	60.3333	6.33333
g14257_c18197_g1_i1	GH31	10.6667	3.12667
g14258_c18197_g3_i1	GH31	10.62	5.85333
g15212_c18445_g3_i1	GH31	38.2133	24.71
g9606_c16609_g2_i1	GH31	10.2433	0
fgenesh1_kg.3_393_#_isotig06124	GH30	39.8704	108.97
fgenesh1_kg.15_58_#_isotig01308	GH30	24.9824	2.46565
g13066_c17888_g1_i1	GH30	17.7033	7.68333
g15456_c18528_g1_i1	GH30	26.01	44.7167
g15181_c18436_g1_i1	GH3	27.8333	1.5
g8214_c15924_g1_i1	GH3	174.333	2.66667
fgenesh1_kg.2_821_#_isotig06015	GH3	104.128	6.28921
fgenesh1_kg.26_15_#_isotig05968	GH3	399.949	50.4161
fgenesh1_kg.6_62_#_isotig04202	GH3	153.391	16.7286
fgenesh1_kg.6_60_#_isotig05756	GH3	48.0772	7.20685
fgenesh1_kg.8_304_#_isotig05207	GH3	31.2942	22.4538
g15081_c18410_g1_i1	GH3	206.553	6.31333
g7004_c15235_g1_i1	GH3	34	10
e_gw1.11.1053.1	GH28	4.71024	23.7624
estExt_Genewise1.C_11_t20365	GH28	2.55919	22.4772
estExt_Genewise1.C_11_t20323	GH28	6.66421	24.363
estExt_Genewise1.C_19_t10193	GH28	18.775	9.71998
fgenesh1_kg.19_41_#_isotig07576	GH28	65.8915	19.3873
fgenesh1_kg.6_308_#_isotig04043	GH28	9.19019	7.20391
fgenesh1_pm.14_120	GH28	6.77734	20.7717
e_gw1.19.205.1	GH28	3.77921	1.95299
estExt_Genewise1Plus.C_1_t40193	GH28	0.884991	2.32118
g10975_c17159_g1_i3	GH28	8.83	19.3833
g5057_c13760_g1_i2	GH28	6.64	7.25
g5058_c13760_g1_i3	GH28	0	1.33333
g7855_c15754_g1_i1	GH28	0.94	0.333333
gm1.511_g	GH27	122.501	35.0907
g19252_c26187_g1_i1	GH27	363	45
fgenesh1_pm.1_993	GH20	6.21136	23.0734
g19258_c26206_g1_i1	GH2	664.667	14.3333
fgenesh1_pm.13_1	GH2	366.008	16.4259
estExt_Genewise1Plus.C_3_t40359	GH2	42.5163	23.0709
fgenesh1_kg.4_585_#_isotig02363	GH2	71.6562	4.64039
g10832_c17103_g1_i5	GH2	1.09667	4.22667
estExt_fgenesh1_kg.C_130109	GH18	54.1182	140.824
estExt_fgenesh1_pg.C_200042	GH18	32.4685	9.59158
estExt_Genewise1.C_4_t30037	GH18	1.95319	5.92275
e_gw1.8.1164.1	GH18	1217.57	940.392
estExt_fgenesh1_kg.C_1_t10319	GH18	62.9856	25.9317
estExt_fgenesh1_kg.C_7_t10305	GH18	25.1604	23.709
estExt_fgenesh1_kg.C_90212	GH18	9.26611	7.8416
estExt_fgenesh1_pm.C_4_t10029	GH18	1.72318	3.78899
estExt_Genemark1.C_8_t10319	GH18	14.3622	23.6343
estExt_Genewise1.C_4_t10184	GH18	12.8178	23.8447
fgenesh1_pm.5_173	GH18	102.006	79.2222
g11691_c17420_g1_i1	GH18	423	78.6667
g14976_c18378_g1_i2	GH18	16.98	1.45
g15710_c18581_g1_i2	GH18	12.35	17.83
g2479_c10912_g1_i1	GH18	302.333	76.3333
g8818_c16229_g1_i1	GH18	86.6867	25.6967
estExt_fgenesh1_kg.C_240070	GH17	124.395	51.9299
g6177_c14686_g2_i1	GH17	3	2.66667
g839_c6536_g1_i1	GH16	73.0533	45.3333
g3265_c11928_g1_i1	GH16	3145.33	195.667
fgenesh1_kg.1_229_#_isotig03093	GH16	248.113	9.25566
estExt_fgenesh1_kg.C_60253	GH16	172	25.9126
estExt_fgenesh1_kg.C_1_t10216	GH16	17.3161	77.012
estExt_Genewise1Plus.C_4_t10361	GH16	8.57334	46.9249
e_gw1.9.231.1	GH16	18.6377	22.3673
fgenesh1_kg.3_532_#_isotig07908	GH16	100.688	191.113
fgenesh1_kg.6_256_#_isotig07340	GH16	71.0579	111.701
e_gw1.14.127.1	GH16	902.684	685.289
estExt_fgenesh1_kg.C_1_t10200	GH16	47.1252	63.1574
estExt_fgenesh1_kg.C_3_t10024	GH16	96.3436	149.662
estExt_Genemark1.C_1_t20266	GH16	184.34	138.04
estExt_Genewise1Plus.C_1_t30468	GH16	766.211	301.612
estExt_Genewise1Plus.C_13_t20226	GH16	24.868	43.1829
fgenesh1_kg.1_563_#_isotig03841	GH16	184.34	138.04
fgenesh1_kg.11_365_#_isotig07578	GH16	521.574	350.609
g11470_c17340_g1_i1	GH16	47.7467	46.5767
g11554_c17374_g1_i5	GH16	142.523	76.09
g13256_c17947_g2_i1	GH16	7.5	0.743333
g1330_c8087_g1_i1	GH16	528.667	210
g15010_c18387_g1_i1	GH16	87.6667	19.3333
g1818_c9480_g1_i1	GH16	357.667	85
g2289_c10554_g1_i1	GH16	160.667	112
g686_c5831_g1_i1	GH16	0.333333	4.66667
g8257_c15948_g1_i1	GH16	1.88	0.56
g8822_c16231_g2_i1	GH16	59	117.333
gm1.2729_g	GH16	96.3436	149.662
estExt_Genemark1.C_3_t20403	GH15	22.4622	197.672
gm1.2890_g	GH15	202.494	98.9649
g11390_c17313_g1_i1	GH15	28.3933	6.88333
g4630_c13382_g1_i1	GH15	407	86
e_gw1.8.1393.1	GH133	94.5949	60.3812
g16214_c18692_g2_i1	GH133	88.6667	21
estExt_fgenesh1_pm.C_2_t20214	GH13	4.15729	7.58678
fgenesh1_kg.4_359_#_isotig05379	GH13	210.778	128.6
e_gw1.6.312.1	GH13	68.2831	22.8225
estExt_Genewise1.C_6_t10102	GH13	26.4225	3.96789
fgenesh1_kg.5_384_#_isotig02455	GH13	42.4845	24.1043
g12861_c17811_g1_i1	GH13	571.333	101
g14935_c18361_g1_i2	GH13	8.29667	0
g19248_c26179_g1_i1	GH13	905	192
g261_c2535_g1_i1	GH13	40.6667	3
estExt_fgenesh1_kg.C_5_t10091	GH128	41.1716	54.0102
g3243_c11868_g1_i1	GH12	4888	4.33333
fgenesh1_kg.3_617_#_isotig01534	GH12	4214.22	27.3266
estExt_Genewise1Plus.C_3_t40151	GH12	1.38124	3.7878
fgenesh1_kg.8_340_#_isotig05645	GH115	25.4808	2.81408
estExt_fgenesh1_kg.C_60217	GH115	6.86438	34.0507
g10396_c16908_g3_i1	GH115	8	0.666667
g6657_c15000_g1_i5	GH115	14	8.18
g18470_c19104_g2_i2	GH10	44.0033	4.95
estExt_Genewise1Plus.C_250046	GH10	197.525	5.82599
estExt_Genewise1Plus.C_7_t10329	GH10	76.0325	5.25111
estExt_Genemark1.C_7_t10154	GH10	47.3188	12.333
estExt_Genewise1Plus.C_7_t10342	GH10	10.1801	5.44991
g18480_c19104_g2_i6	GH10	136.253	12.7033
e_gw1.9.735.1	GH1	50.1383	3.55413
g13961_c18127_g2_i7	GH1	0.23	0.124
estExt_fgenesh1_pm.C_120128	CE9	78.5895	37.525
g2816_c11251_g1_i2	CE9	115.48	23.3167
estExt_Genemark1.C_100045	CE8	5.25472	17.2494
g19382_c27264_g1_i1	CE8	1.33333	1
g7656_c15629_g1_i1	CE4	20.42	18.7267
e_gw1.13.70.1	CE4	26.3675	269.3
fgenesh1_kg.1_303_#_isotig05987	CE4	162.998	158.071
fgenesh1_pm.1_225	CE4	162.998	158.071
estExt_Genewise1Plus.C_4_t10105	CE4	2.46051	8.08263
g9315_c16483_g1_i1	CE4	276.667	100.667
gw1.4.95.1	CE4	6.3663	7.68344
estExt_fgenesh1_kg.C_2_t10220	CE16	99.0601	18.401
estExt_Genewise1Plus.C_6_t20386	CE16	1147.48	269.321
fgenesh1_kg.6_220_#_isotig08447	CE16	1147.48	269.321
estExt_fgenesh1_kg.C_2_t10251	CE16	4.93065	3.34659
estExt_fgenesh1_kg.C_2_t10270	CE16	88.3047	39.3616
g15594_c18564_g1_i1	CE16	15.3333	3.33333
g5793_c14409_g1_i1	CE16	971.667	87.3333
g2965_c11467_g1_i1	CE15	165.093	3.09
fgenesh1_kg.3_59_#_isotig00563	CE15	159.751	36.7167
estExt_fgenesh1_kg.C_210055	CE10	16.5457	85.9441
estExt_fgenesh1_pg.C_120078	CE10	13.4464	8.80428
estExt_fgenesh1_pm.C_1_t30009	CE10	6.6335	11.9561
estExt_Genewise1.C_1_t60291	CE10	106.631	125.331
fgenesh1_pm.1_445	CE10	2.76	3.13
g13299_c17951_g1_i1	CE10	87.1433	14.46
fgenesh1_kg.1_690_#_isotig08606	CE1	92.7089	65.4663
g10228_c16843_g1_i1	CE1	0.443	0.333333
g2829_c11279_g1_i1	CBM43	81.84	29.4733
estExt_fgenesh1_kg.C_2_t20201	CBM21	29.0442	27.5242
g13365_c17973_g1_i1	CBM21	64	13
g4232_c13019_g1_i2	CBM21	168.01	46.12
fgenesh1_kg.9_309_#_isotig05093	AA6	96.818	287.67
g18807_c19275_g1_i1	AA6	83.3333	42
g18852_c19531_g1_i1	AA6	0.12	0.333333
